# Supplementary material for: Relationship of diversity and habitat area in North Pacific plastic-associated rafting communities
Source: Springer Nature journal article supplement (doi:10.1007/s00227-014-2432-8), 2014-04-12
Supplement: 227_2014_2432_MOESM1_ESM.pdf [file 227_2014_2432_MOESM1_ESM.pdf]

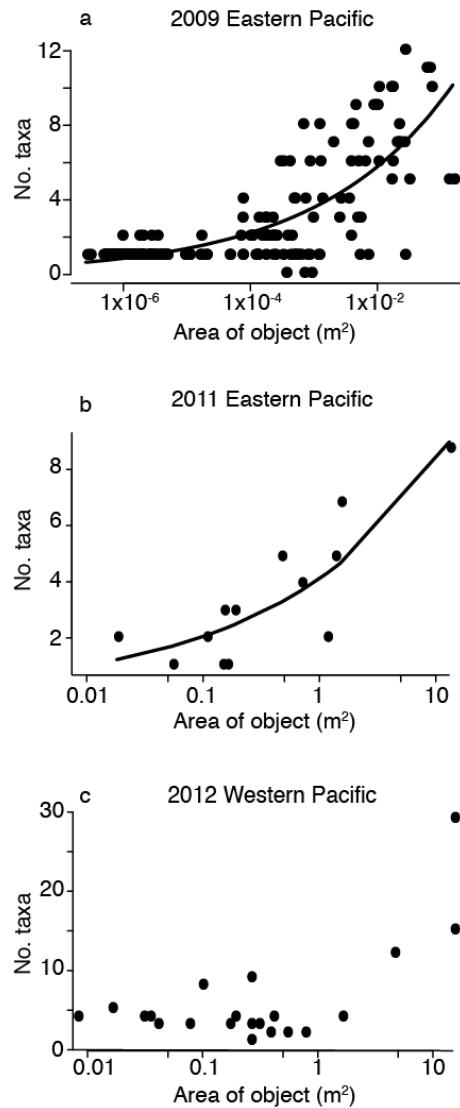

**Figure S1. Semilog plots of taxa vs. surface area (m<sup>2</sup>) of debris object, by cruise**

Solid line is an exponential non-linear least squares regression. a) 2009 Eastern Pacific

(Kendall's tau,  $\tau=0.561$ ,  $N=208$ ,  $P<0.001$ ); b) 2011 Eastern Pacific (Kendall's tau,  $\tau=0.650$ ,

$N=13$ ,  $P=0.003$ ); c) 2012 Western Pacific (Kendall's tau,  $\tau=0.062$ ,  $N=21$ ,  $P=0.710$ ). No fit line is

included in (c) due to the lack of a significant correlation, which was caused by limited sample

size of large objects. Differences in x-axis scale between 2009 and 2011/2012 are due to

different sampling methodologies.

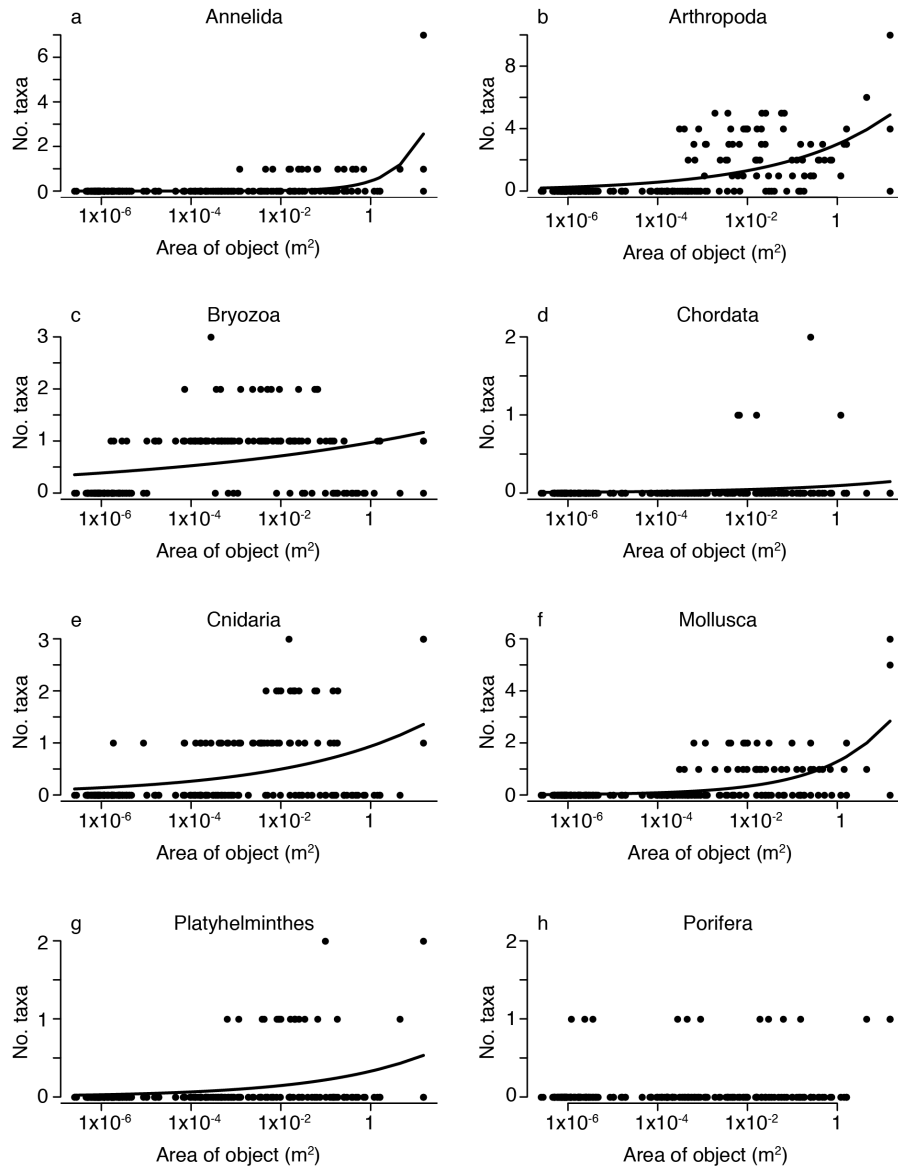

**Figure S2. Semilog plots of taxa vs. surface area ( $\text{m}^2$ ) of debris object, by phylum**

Solid line is an exponential non-linear least squares regression. All following statistics are for Kendall's tau, with sample size  $N=242$ . a) Annelida,  $\tau=0.304$ ,  $P<0.001$ ; b) Arthropoda,  $\tau=0.526$ ,  $P<0.001$ ; c) Bryozoa,  $\tau=0.447$ ,  $P<0.001$ ; d) Chordata,  $\tau=0.142$ ,  $P=0.007$ ; e) Cnidaria,  $\tau=0.394$ ;  $P<0.001$ ; f) Mollusca,  $\tau=0.417$ ,  $P<0.001$ ; g) Platyhelminthes,  $\tau=0.267$ ,  $P<0.001$ ; h) Porifera,  $\tau=0.163$ ,  $P=0.002$ . If the 4 largest objects are excluded, all relationships remain significant with the exception of Porifera ( $\tau=0.082$ ,  $P=0.121$ ).
